# Supplementary material for: Nanostructured Thick Electrode Strategies toward Enhanced Electrode–Electrolyte Interfaces
Source: MDPI journal article supplement (doi:10.3390/ma16093439), 2023-04-28
Supplement: s1 [file s1]

# Supporting Information

## Nanostructured thick electrode strategies toward enhanced electrode-electrolyte interfaces

Anukriti Pokhriyal, Rosa M. González-Gil, Leandro N. Bengoa and Pedro Gómez-Romero \*

Novel Energy-Oriented Materials Group at Catalan Institute of Nanoscience and Nanotechnology (ICN2) CSIC and BIST, Campus UAB, Bellaterra, 08193 Barcelona, Spain; anukriti.pokhriyal@icn2.cat (A.P.); rosamaria.gonzalez@icn2.cat (R.M.G.-G.); leandro.bengoa@icn2.cat (L.N.B.)

\* Correspondence: pedro.gomez@icn2.cat

**Table S1: Description of various coatings developed for spray casting**

|                 | Composition     | Ratio    | Fabrication method | Coating           | No of coatings (n) |
|-----------------|-----------------|----------|--------------------|-------------------|--------------------|
| CSP_5%CMC       | AC:CSP:CMC      | 85:10:5  | Spray Coating      | 1_CSP_5%CMC       | 4                  |
|                 |                 |          |                    | 2_CSP_5%CMC       | 15                 |
|                 |                 |          |                    | 3_CSP_5%CMC       | 35                 |
|                 |                 |          |                    | 4_CSP_5%CMC       | 50                 |
| CNT_5%CMC       | AC:CNT:CMC      | 85:10:5  | Spray Coating      | 1_CNT_5%CMC       | 4                  |
|                 |                 |          |                    | 2_CNT_5%CMC       | 15                 |
|                 |                 |          |                    | 3_CNT_5%CMC       | 35                 |
|                 |                 |          |                    | 4_CNT_5%CMC       | 50                 |
|                 |                 |          |                    | 5_CNT_5%CMC       | 60                 |
| CSP_10%PVDF HFP | AC:CSP:PVDF HFP | 80:10:10 | Spray Coating      | 1_CSP_10%PVDF HFP | 3                  |
|                 |                 |          |                    | 4_CSP_10%PVDF HFP | 27                 |
|                 |                 |          |                    | 5_CSP_10%PVDF HFP | 40                 |
| CSP_15%PVDF HFP | AC:CSP:PVDF HFP | 75:10:15 | Spray Coating      | 1_CSP_15%PVDF HFP | 3                  |
|                 |                 |          |                    | 4_CSP_15%PVDF HFP | 27                 |
| Lyophilisation  | AC:CSP:CMC      | 85:10:5  | Freeze casting     | 2_LYO_5%CMC       | 1                  |
|                 |                 |          |                    | 3A_LYO_5%CMC      | 3                  |
|                 |                 |          |                    | 3B_LYO_5%CMC      | 3                  |

**Table S2: Theoretical density of materials for slurry preparation**

| Material                     | True Density (g cm <sup>-3</sup> ) |
|------------------------------|------------------------------------|
| Activated Carbon (YP80F)     | 0.27 [51]                          |
| Carbon black                 | 0.16 [52]                          |
| Multiwalled Carbon Nanotubes | 2.1 [53]                           |
| CMC                          | 1.60 [54]                          |
| PVDF HFP                     | 1.78 [55]                          |

**Table S3: Specifications of electrodes**

|                   | Electrode<br>Mass<br>(mg) | Thickness<br>( $\mu\text{m}$ ) | Capacitance<br>(10 mV s <sup>-1</sup> )<br>(mF cm <sup>-2</sup> ) | Capacitance<br>(at 10 mV s <sup>-1</sup> ) (F cm <sup>-3</sup> ) | Capacitance<br>(at 10 mV s <sup>-1</sup> ) (F g <sup>-1</sup> ) | Porosity | Tortuosity | Specific Energy<br>(Wh kg <sup>-1</sup> ) | Specific Power<br>(W kg <sup>-1</sup> ) |
|-------------------|---------------------------|--------------------------------|-------------------------------------------------------------------|------------------------------------------------------------------|-----------------------------------------------------------------|----------|------------|-------------------------------------------|-----------------------------------------|
| 1_CSP_5%CMC       | 1.37                      | 31                             | 87                                                                | 28                                                               | 98                                                              | 89%      | 2.5        | 22                                        | 679                                     |
| 2_CSP_5%CMC       | 5.58                      | 82                             | 341                                                               | 42                                                               | 94                                                              | 83%      | 1.0        | 24                                        | 692                                     |
| 3_CSP_5%CMC       | 10.00                     | 151                            | 656                                                               | 43                                                               | 102                                                             | 84%      | 0.8        | 25                                        | 680                                     |
| 4_CSP_5%CMC       | 17.09                     | 317                            | 1098                                                              | 35                                                               | 99                                                              | 87%      | 1.0        | 26                                        | 770                                     |
| 1_CNT_5%CMC       | 1.70                      | 31                             | 103                                                               | 33                                                               | 94                                                              | 89%      | 4.6        | 23                                        | 686                                     |
| 2_CNT_5%CMC       | 8.49                      | 141                            | 552                                                               | 39                                                               | 100                                                             | 87%      | 0.7        | 24                                        | 713                                     |
| 3_CNT_5%CMC       | 13.65                     | 210                            | 789                                                               | 38                                                               | 89                                                              | 86%      | 0.7        | 26                                        | 745                                     |
| 4_CNT_5%CMC       | 23.88                     | 369                            | 1428                                                              | 39                                                               | 92                                                              | 86%      | 0.5        | 26                                        | 760                                     |
| 5_CNT_5%CMC       | 47.81                     | 629                            | 2459                                                              | 39                                                               | 79                                                              | 84%      | 0.2        | 19                                        | 942                                     |
| 2_LYO_5%CMC       | 7.54                      | 271                            | 407                                                               | 15                                                               | 83                                                              | 93%      | 0.9        | 21                                        | 704                                     |
| 3A_LYO_5%CMC      | 10.78                     | 647                            | 567                                                               | 9                                                                | 81                                                              | 96%      | 0.1        | 20                                        | 732                                     |
| 3B_LYO_5%CMC      | 12.60                     | 215                            | 721                                                               | 34                                                               | 88                                                              | 85%      | 0.4        | 21                                        | 683                                     |
| 1_CSP_10%PVDF HFP | 1.43                      | 23                             | 83                                                                | 37                                                               | 89                                                              | 85%      | 4.3        | 22                                        | 681                                     |
| 4_CSP_10%PVDF HFP | 25.74                     | 322                            | 1351                                                              | 42                                                               | 81                                                              | 81%      | 0.4        | 20                                        | 744                                     |
| 5_CSP_10%PVDF HFP | 46.32                     | 543                            | 2261                                                              | 42                                                               | 75                                                              | 80%      | 0.1        | 21                                        | 927                                     |
| 1_CSP 15%PVDF HFP | 0.84                      | 21                             | 58                                                                | 28                                                               | 107                                                             | 91%      | 8.1        | 27                                        | 784                                     |
| 4_CSP_15%PVDF HFP | 21.18                     | 333                            | 1285                                                              | 39                                                               | 93                                                              | 86%      | 0.3        | 24                                        | 716                                     |

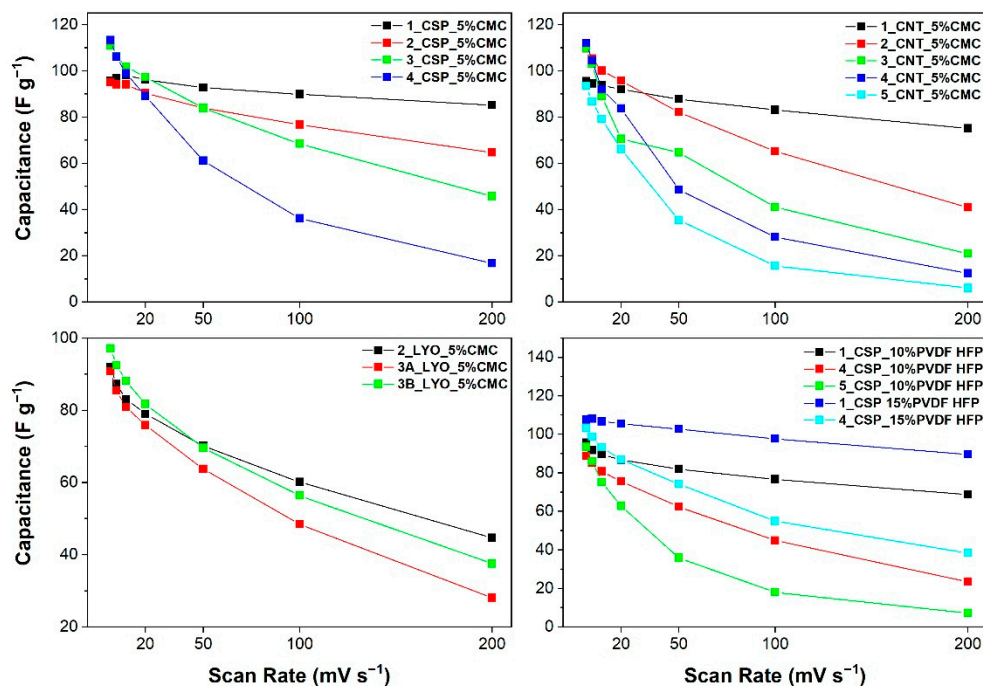

Figure S1: Gravimetric capacitance at different scan rates

Figure S1 shows the gravimetric capacitance of electrodes of different thicknesses at various scan rates. In some of our electrodes, at very low scan rates (2 and 5 mV s<sup>-1</sup>) the gravimetric capacitance of thicker electrodes was observed to be slightly higher than that of their thin counterparts. However, this difference was within the statistical variability of our measurements.

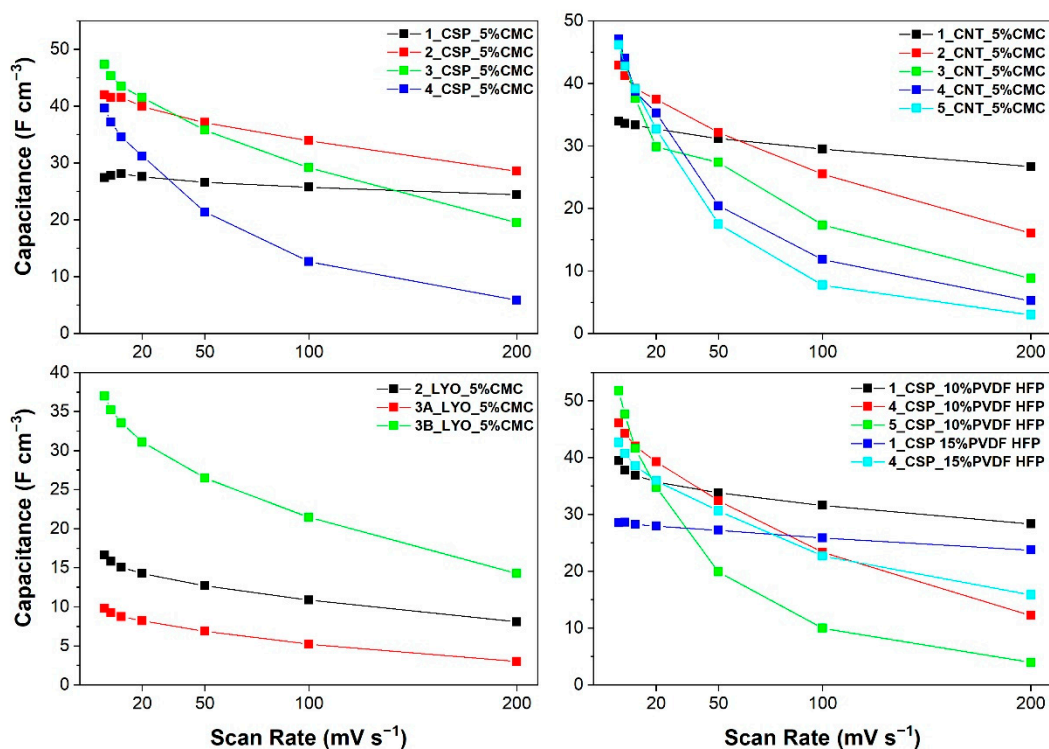

Figure S2: Volumetric capacitance at different scan rates

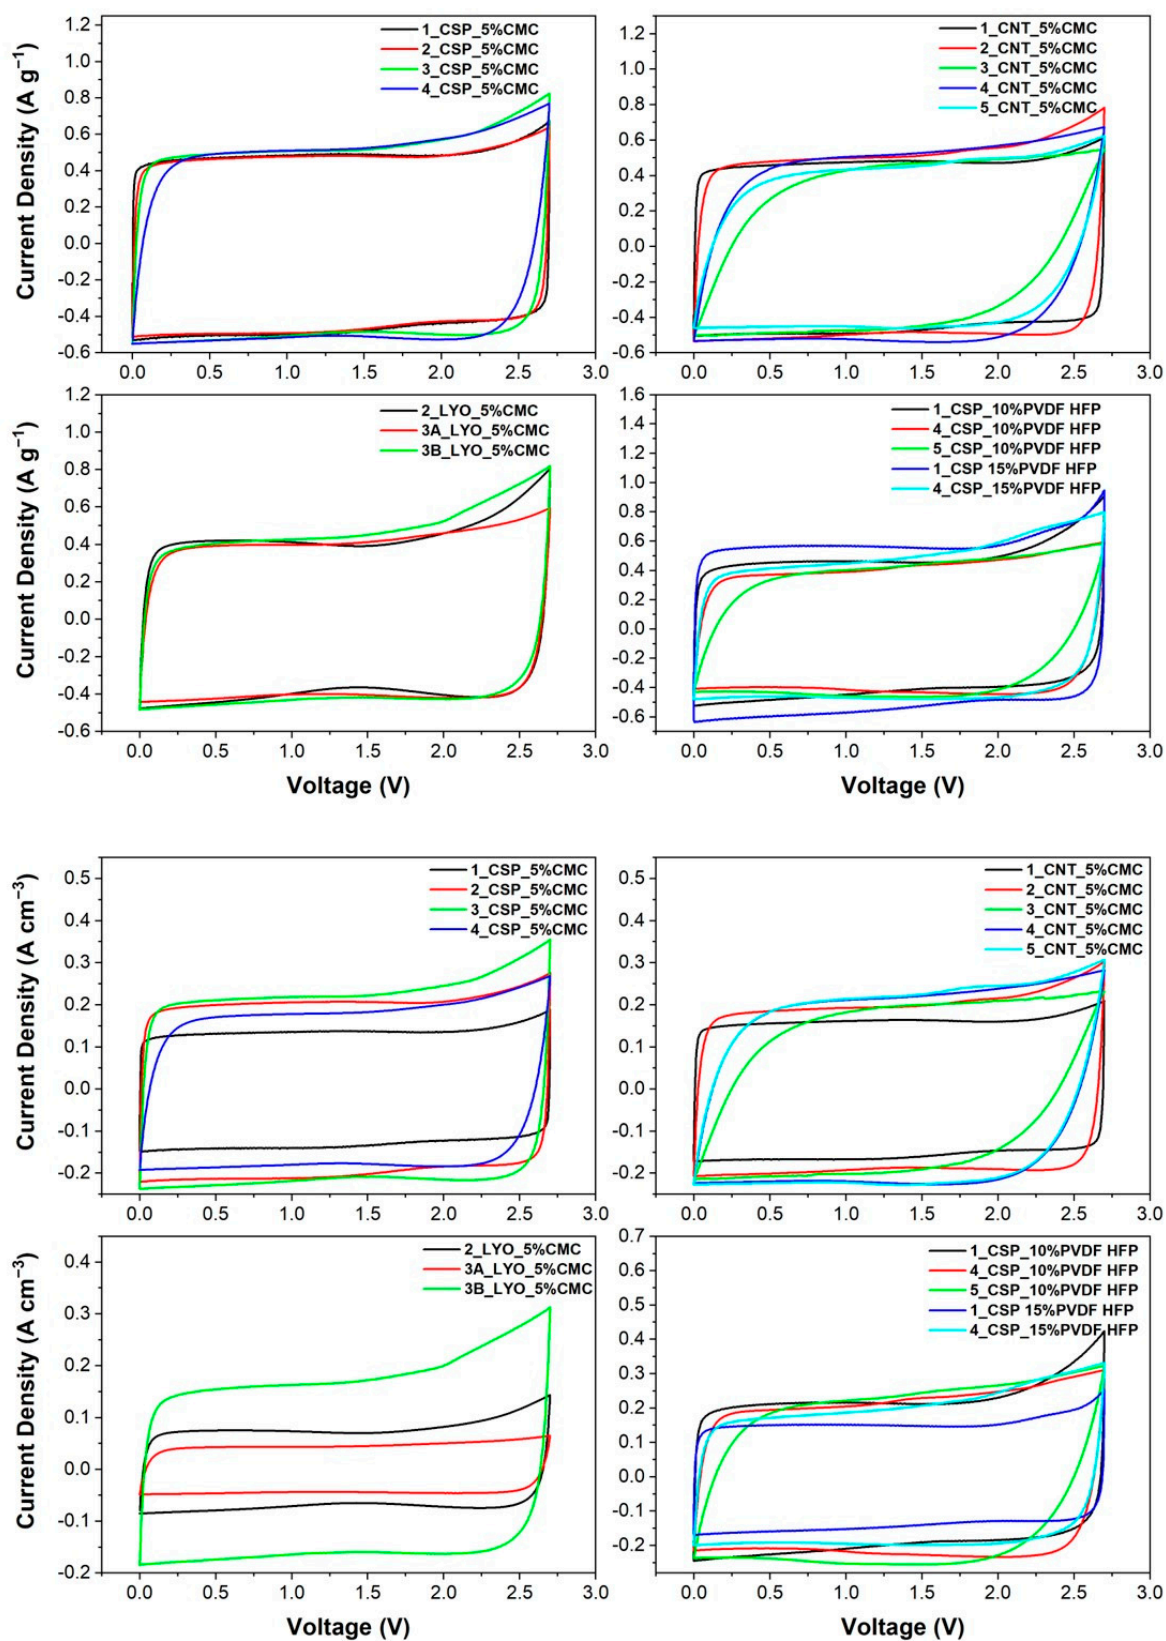

Figure S3: Cyclic polarisations of different electrode materials at  $10 \text{ mV s}^{-1}$

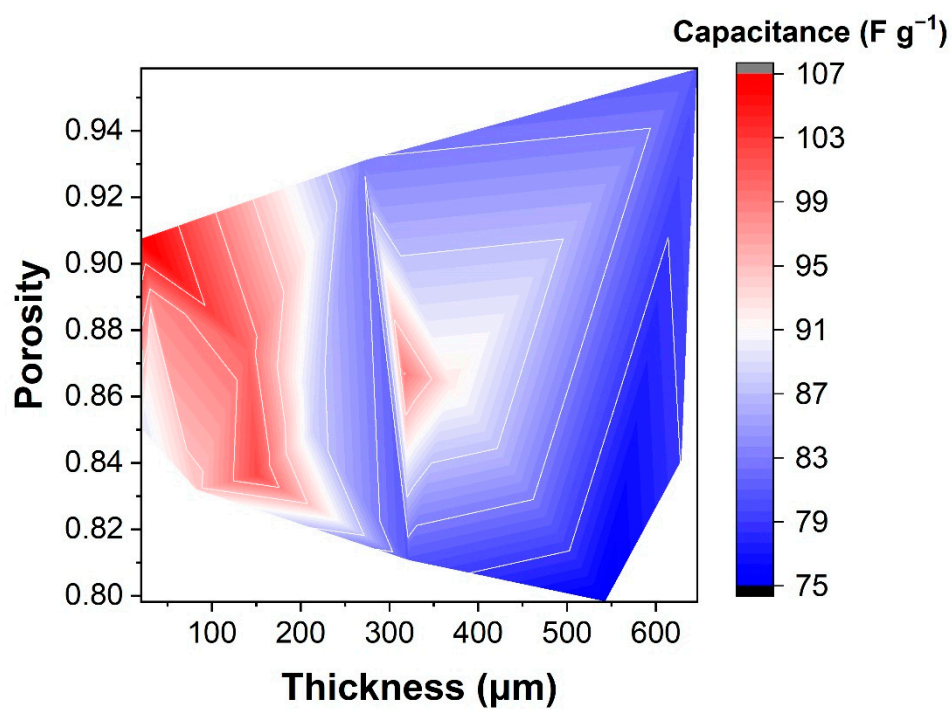

Figure S4: Dependence of electrode gravimetric capacitance (at  $10 \text{ mV s}^{-1}$ ) on thickness and porosity

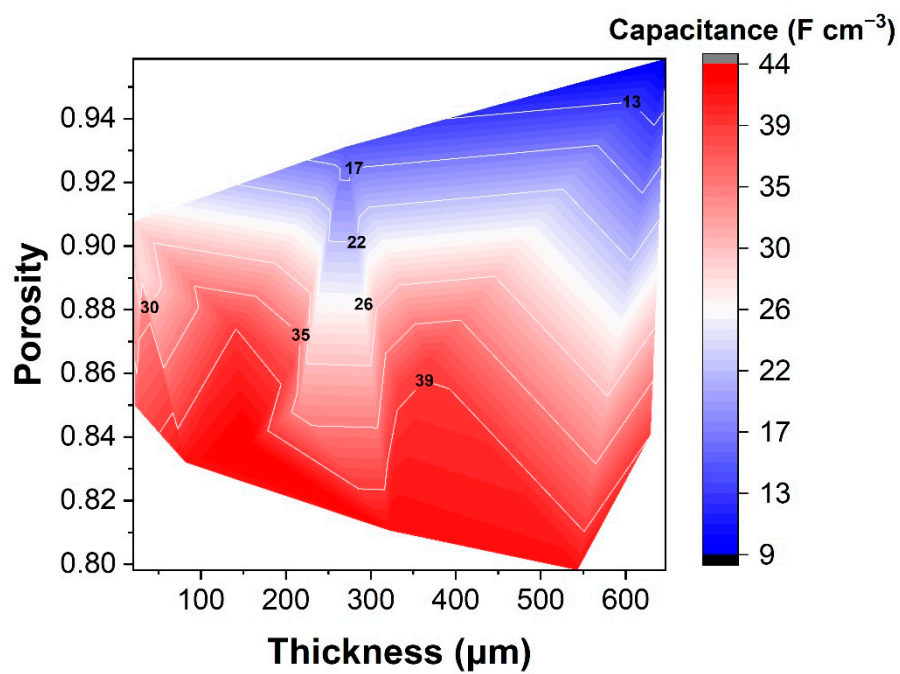

Figure S5: Dependence of electrode volumetric capacitance (at  $10 \text{ mV s}^{-1}$ ) on thickness and porosity

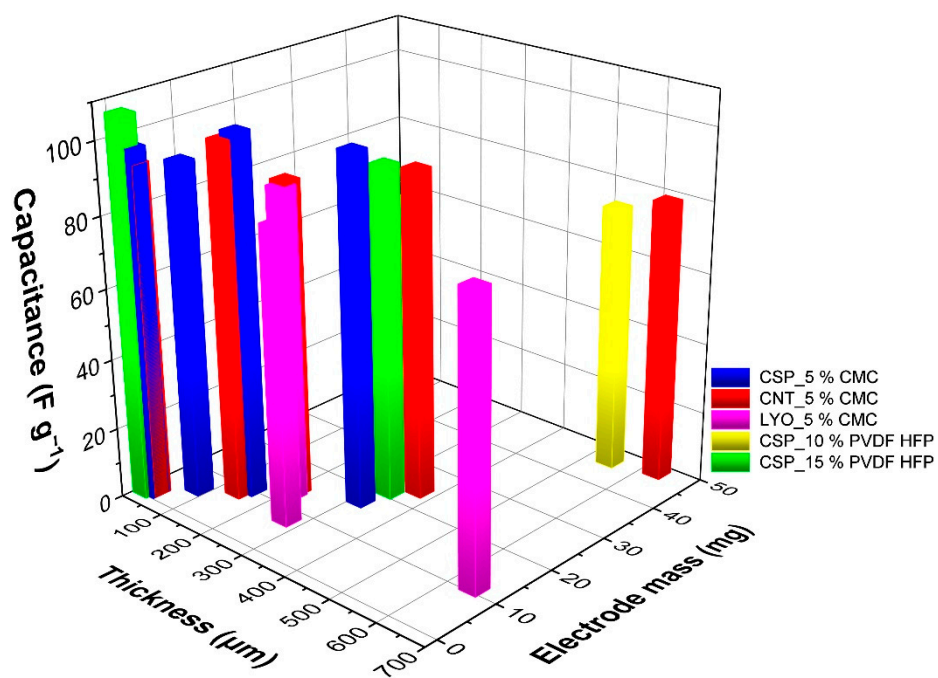

Figure S6: Gravimetric capacitance (at  $10 \text{ mV s}^{-1}$ ) of various electrodes as a function of thickness and mass

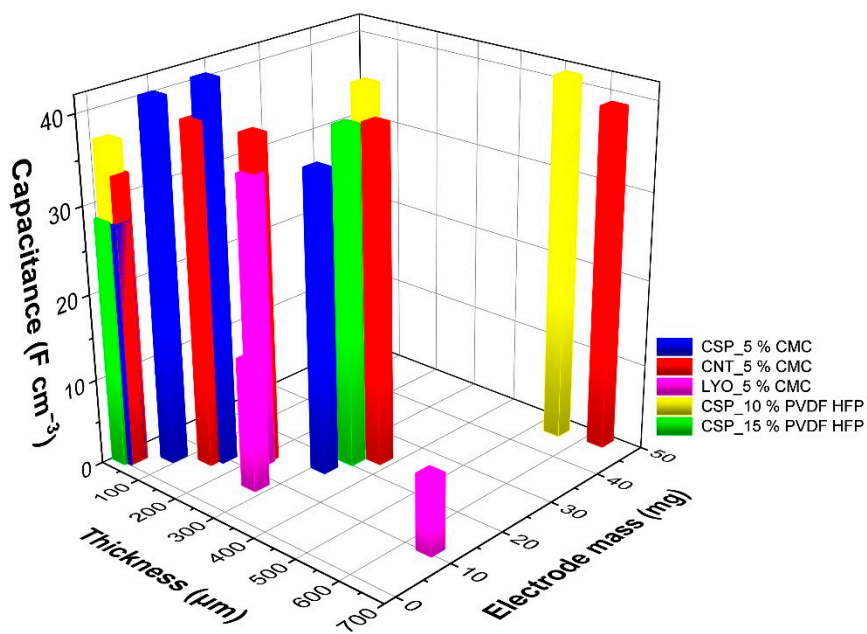

Figure S7: Volumetric capacitance (at  $10 \text{ mV s}^{-1}$ ) of various electrodes as a function of thickness and mass
